# Supplementary material for: Palmitate impairs autophagic degradation via oxidative stress/perilysosomal Ca2+ overload/mTORC1 activation pathway in pancreatic β cells
Source: JCI journal article supplement (doi:10.1172/jci.insight.192827), 2025-11-11

# Figure 1B

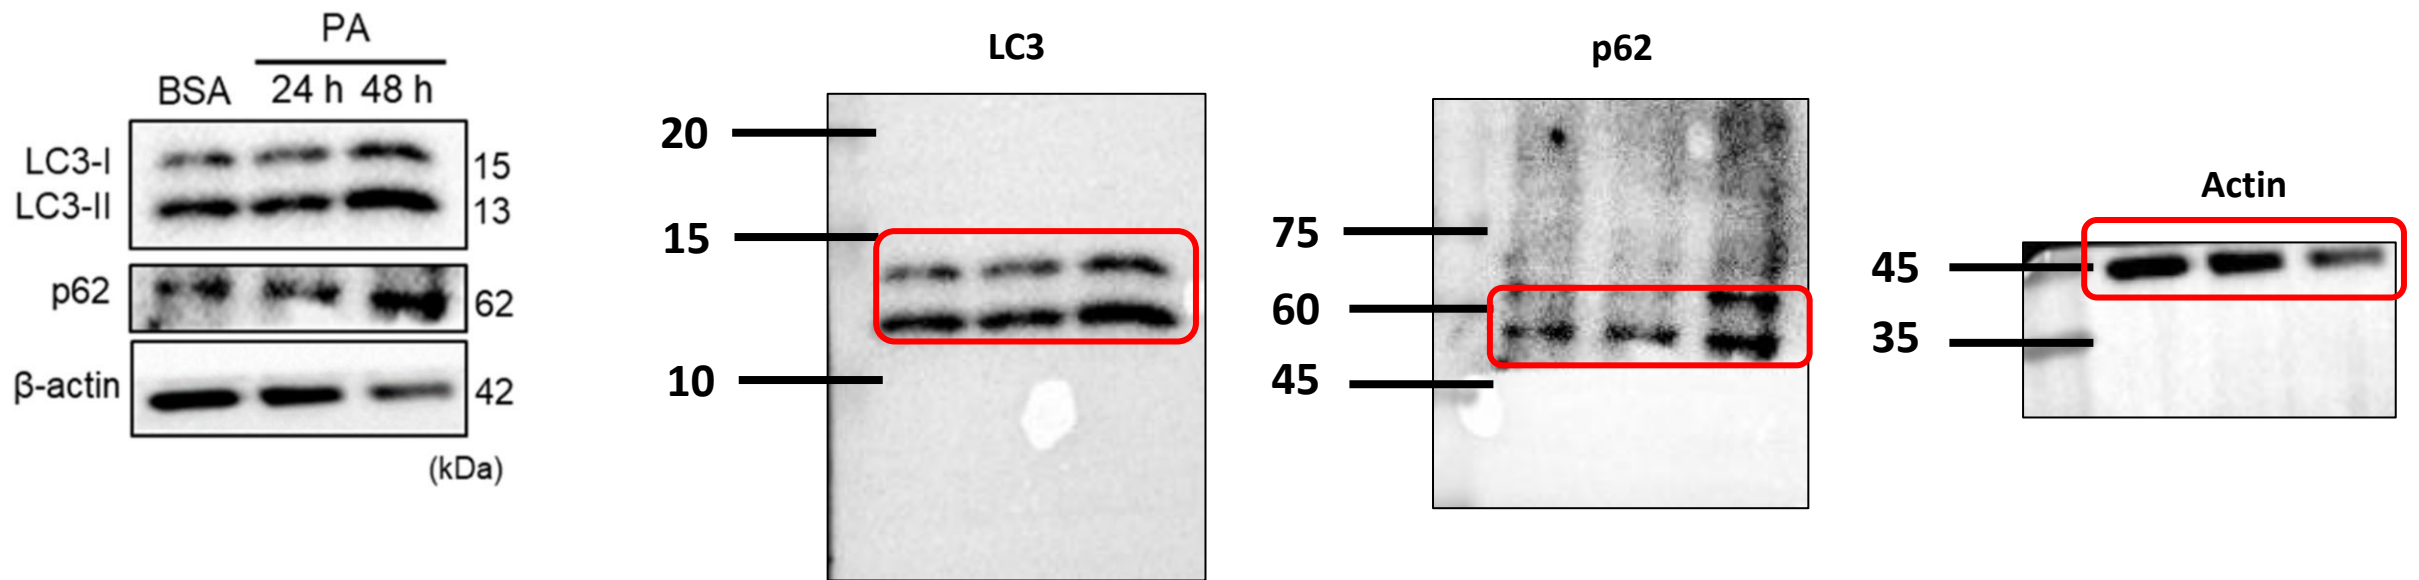

# Figure 1D

p-p70S6K 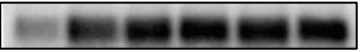 (kDa)  
70

t-p70S6K 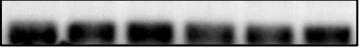 70

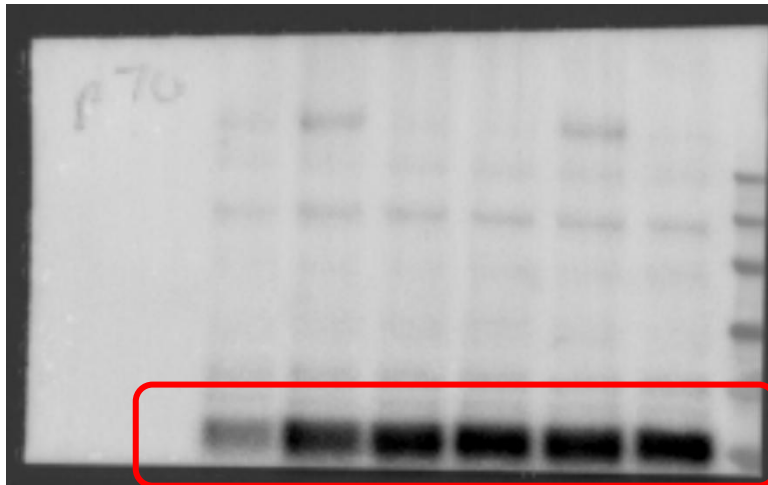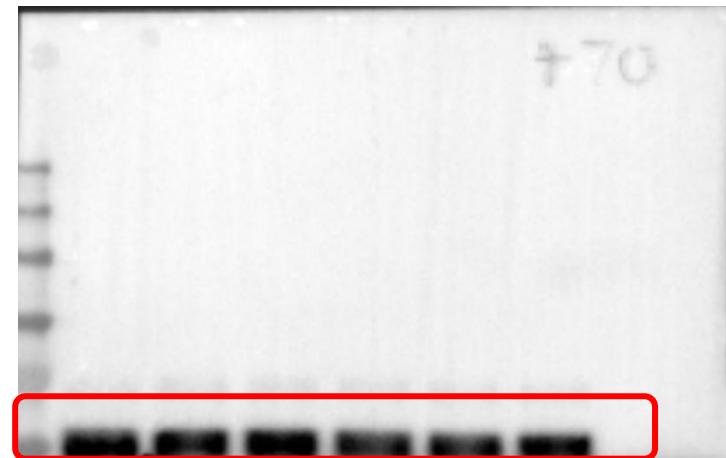

Figure 1D

p-AMPK 60

t-AMPK 60

$\beta$ -actin 45

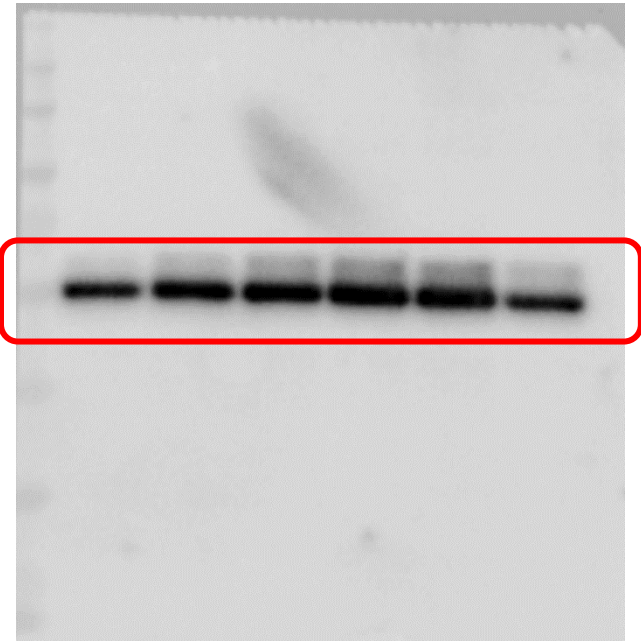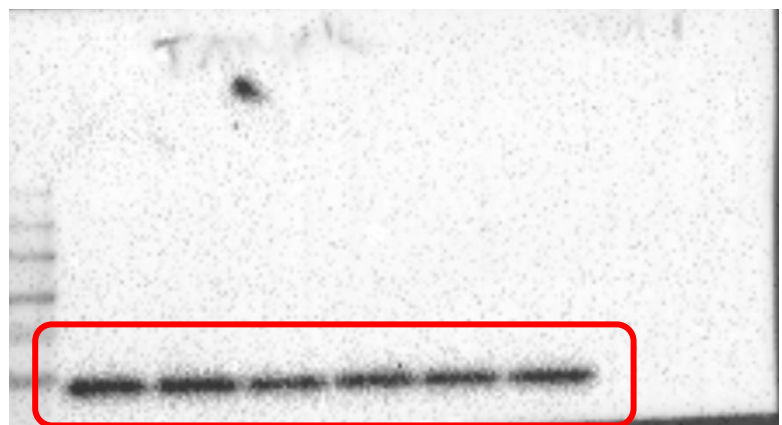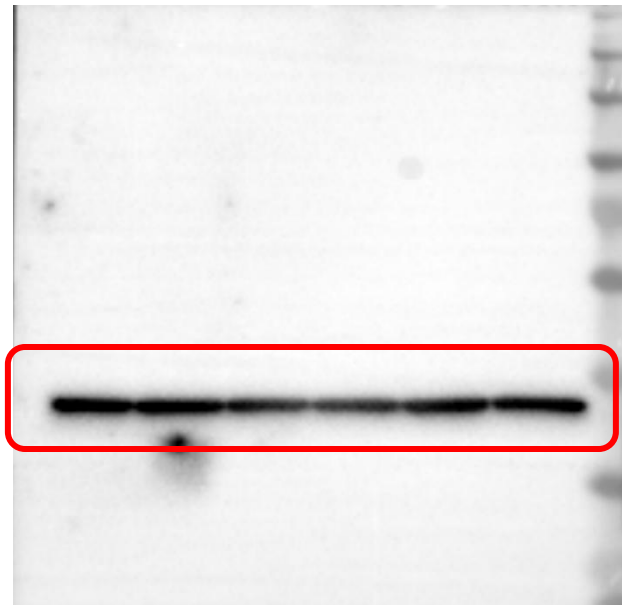

Figure 1H

H

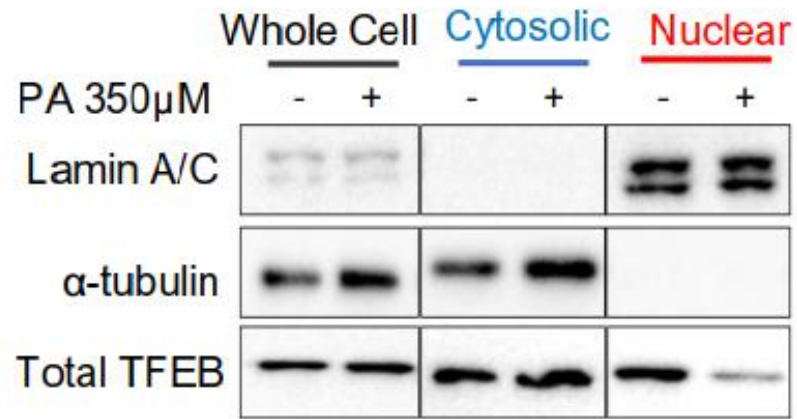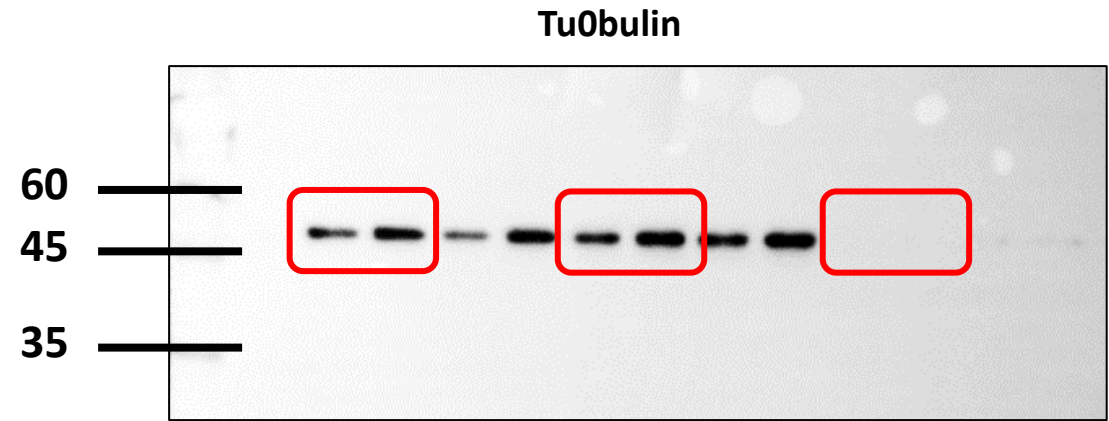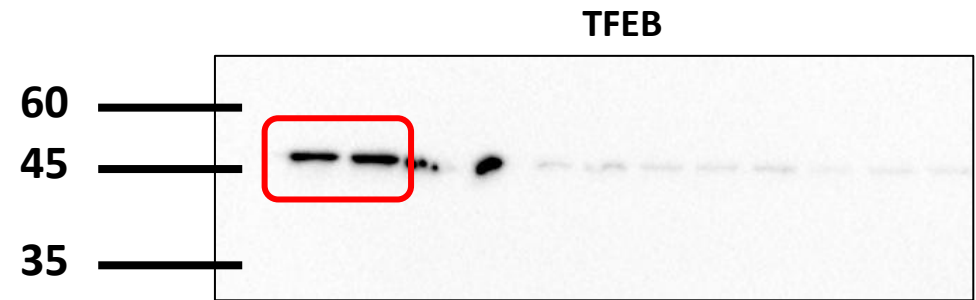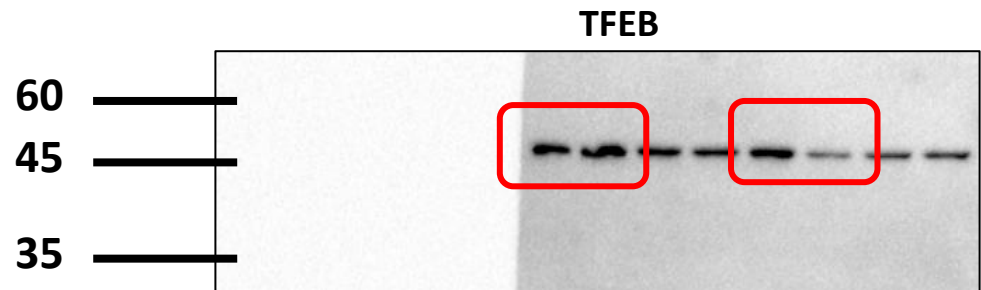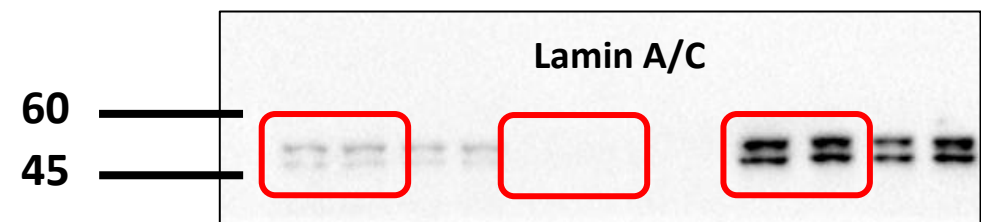

# Figure 1J

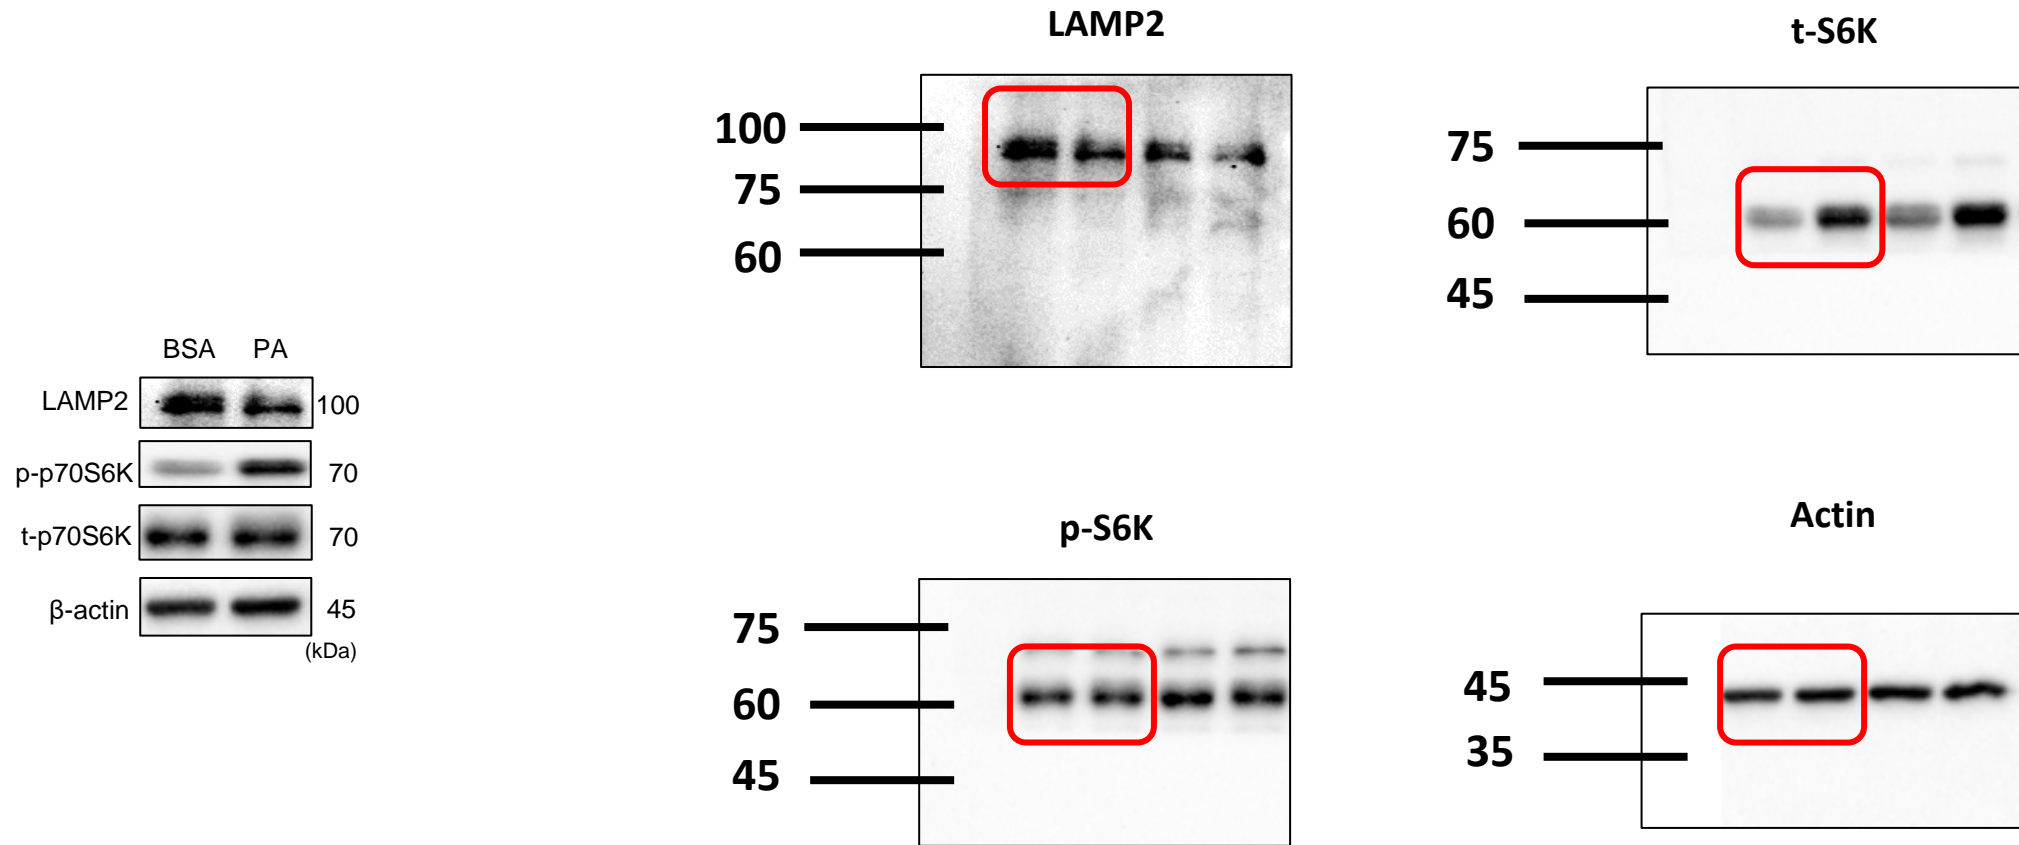

# Figure 3A

## A

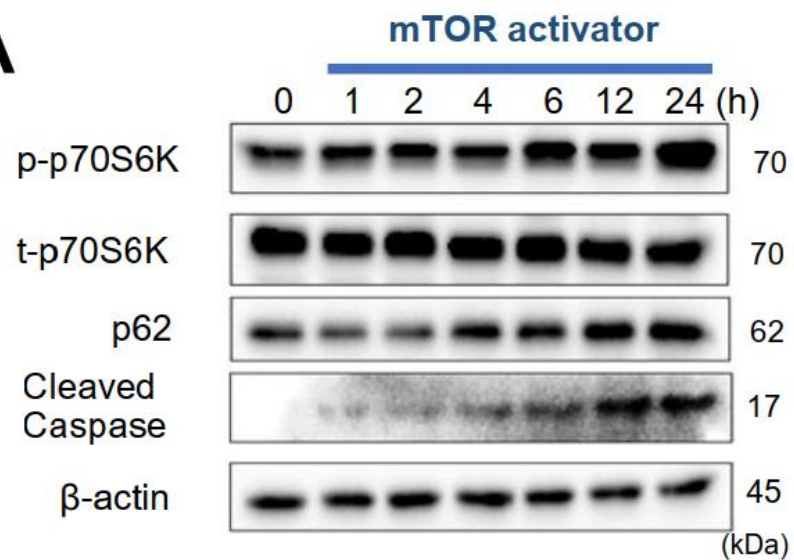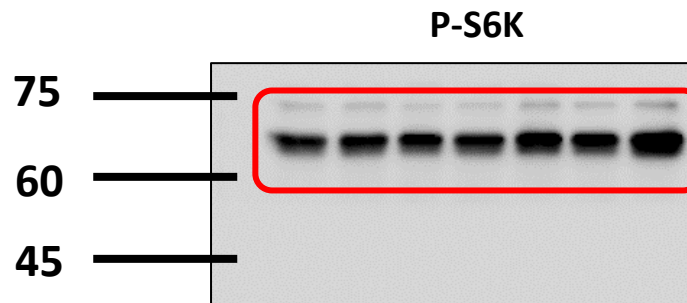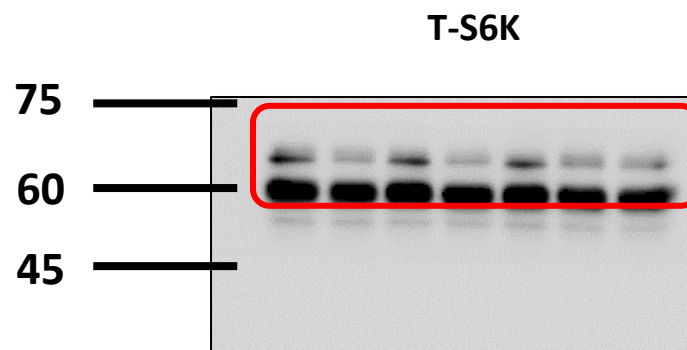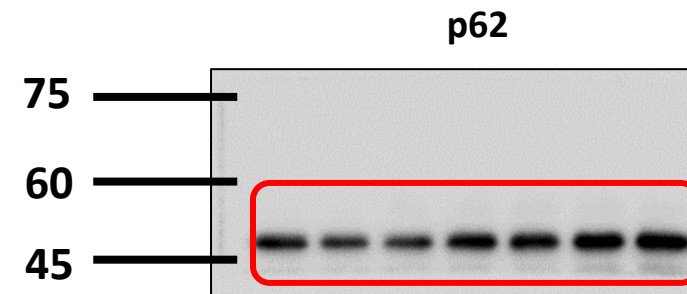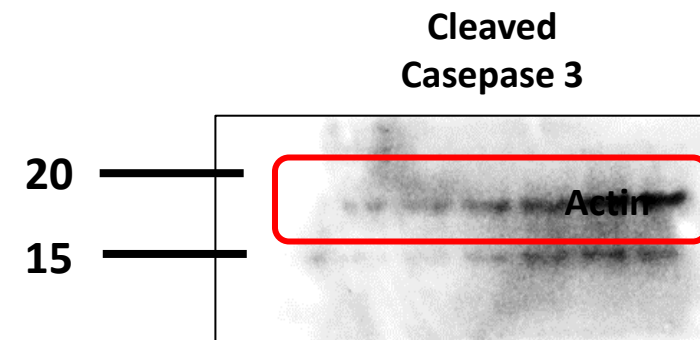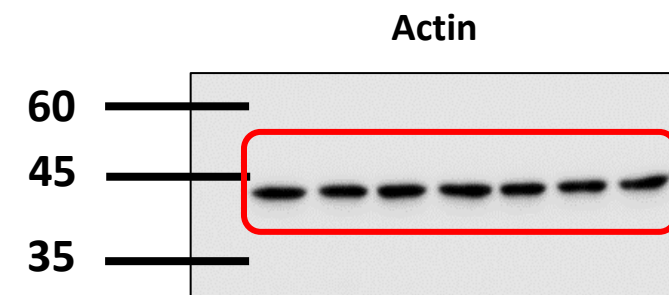

# Figure 3G

## G

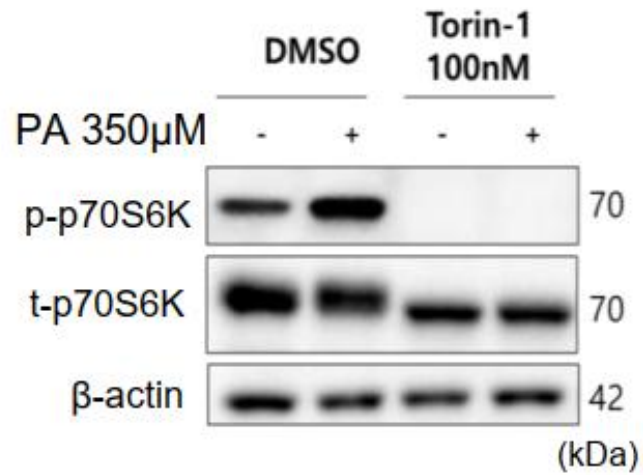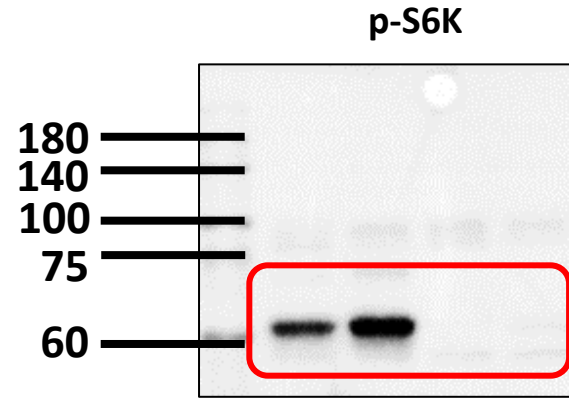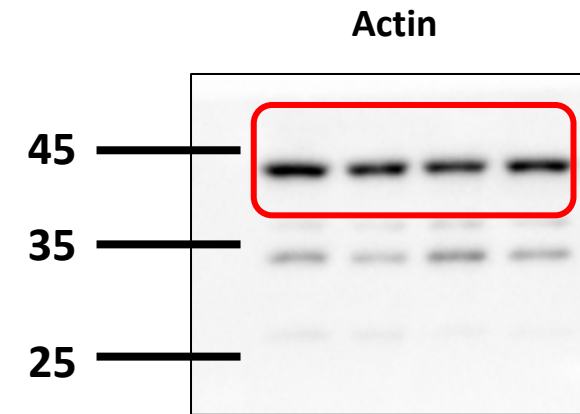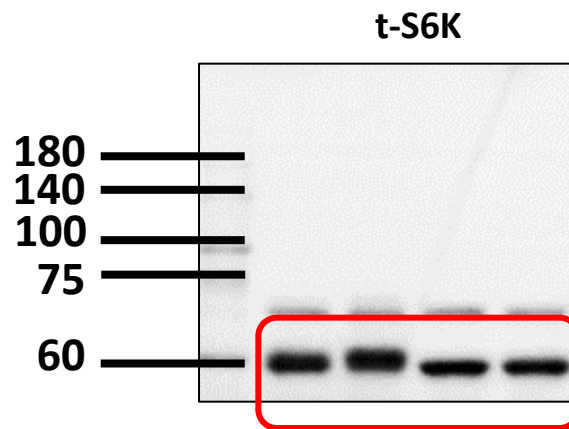

# Figure 4A

## A

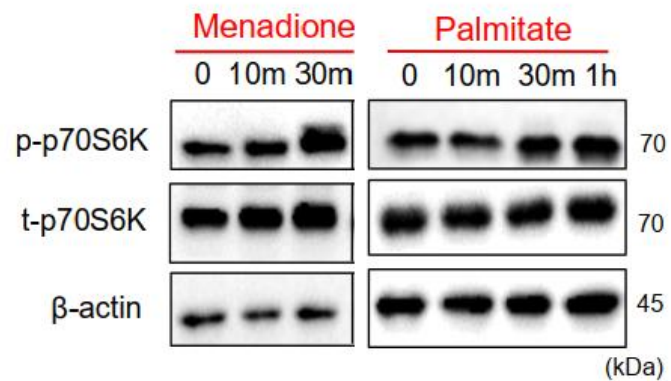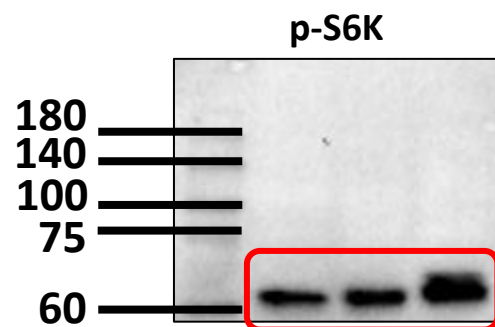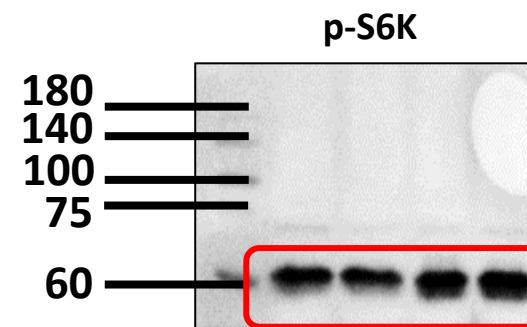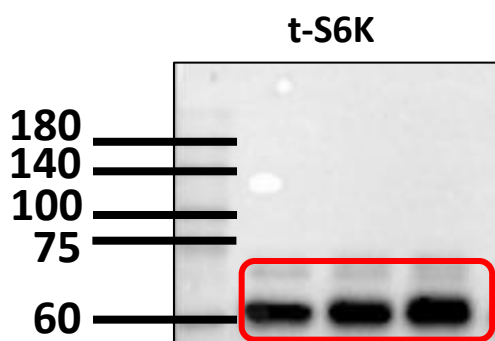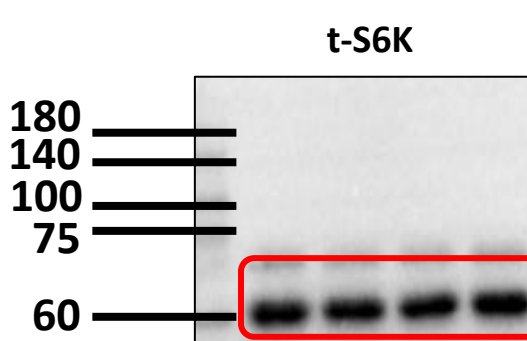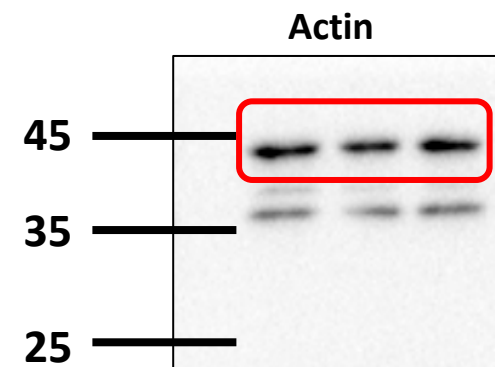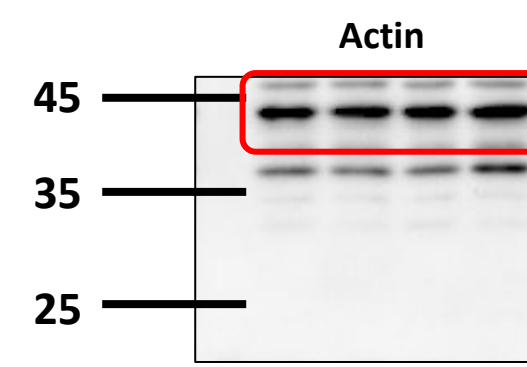

# Figure 4E

## E

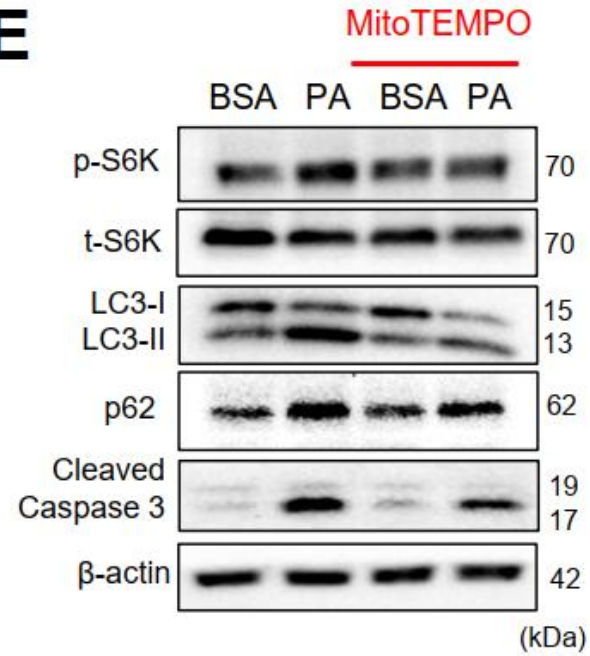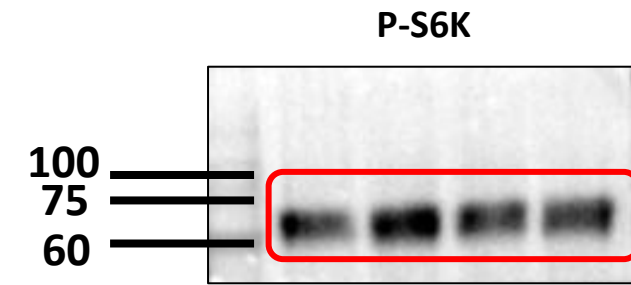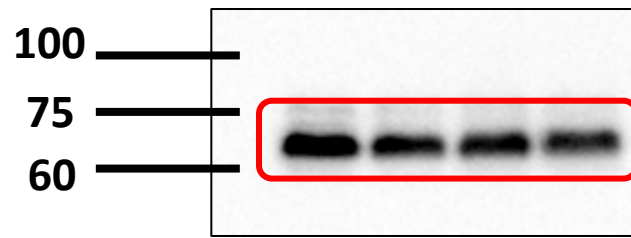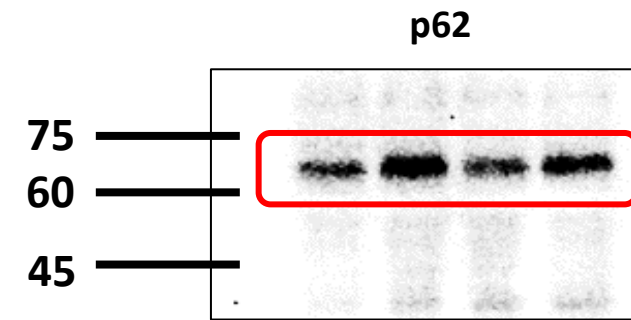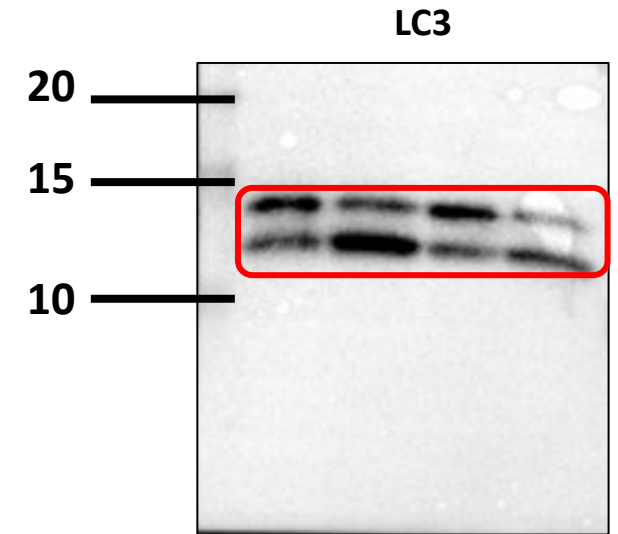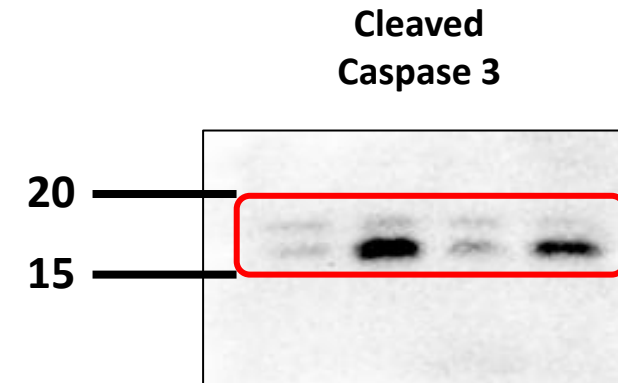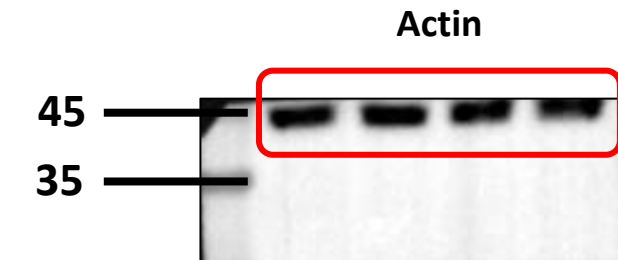

# Figure 5A

## A

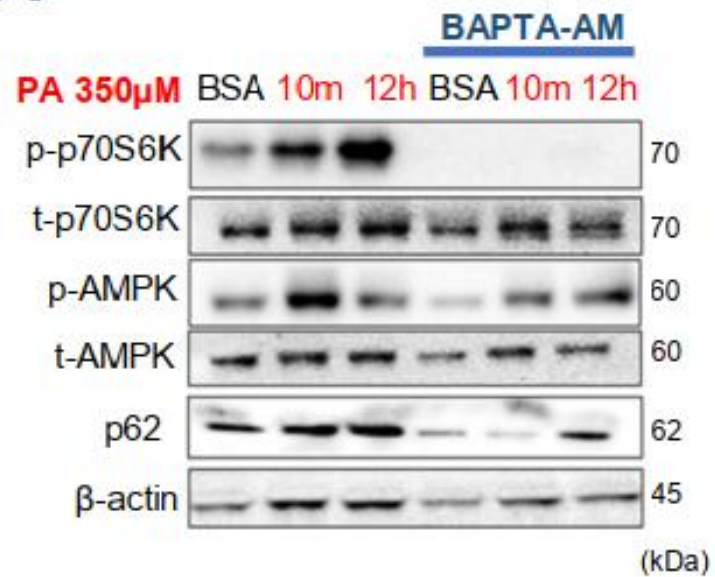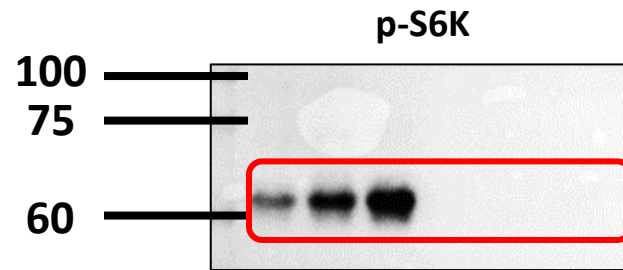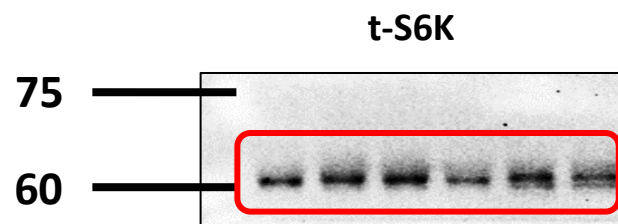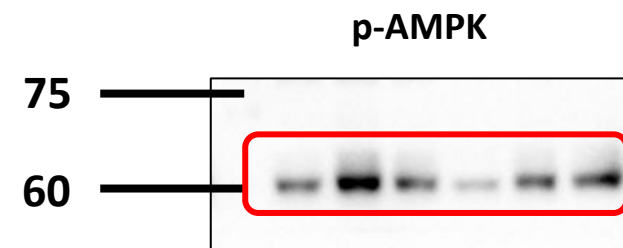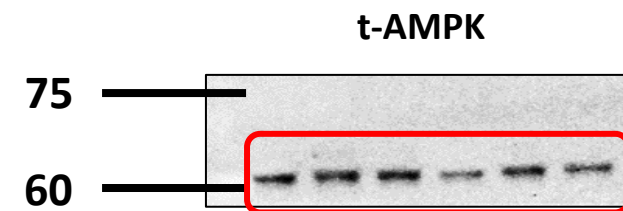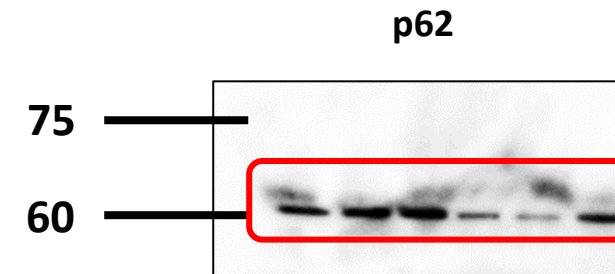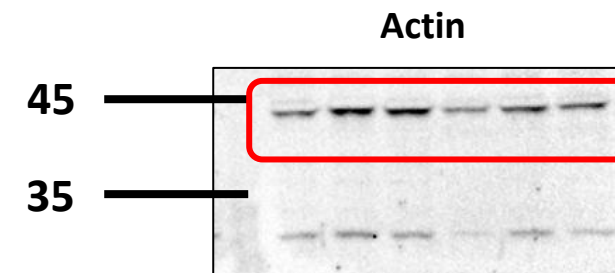

# Figure 5B

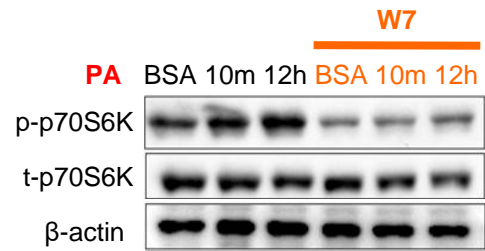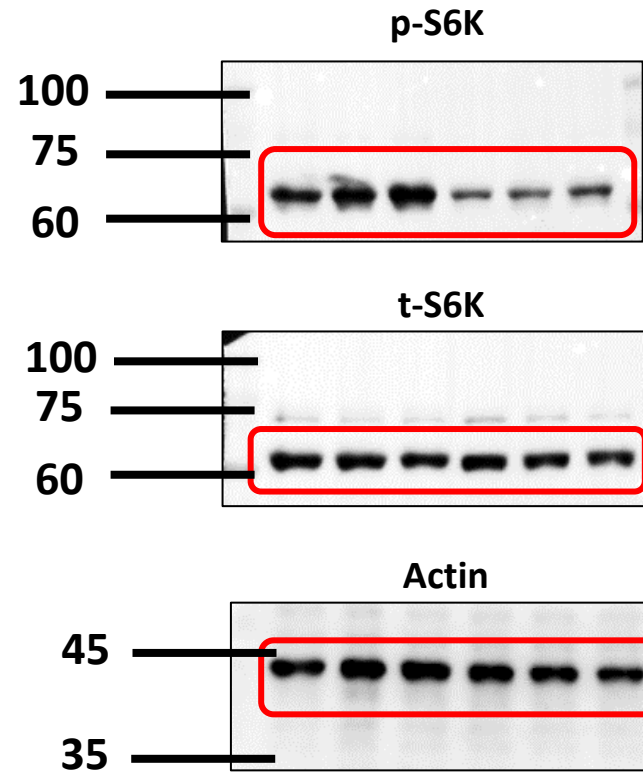

# Figure 5B-KN62

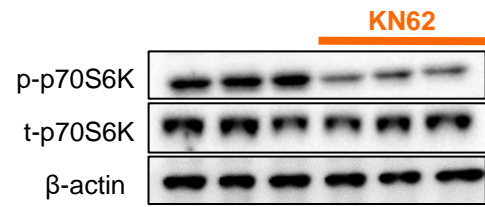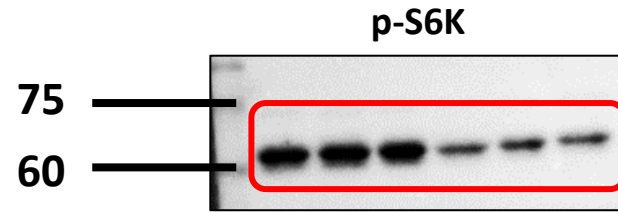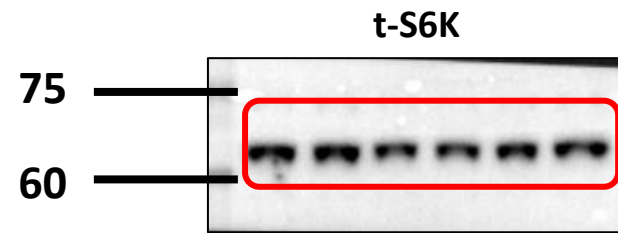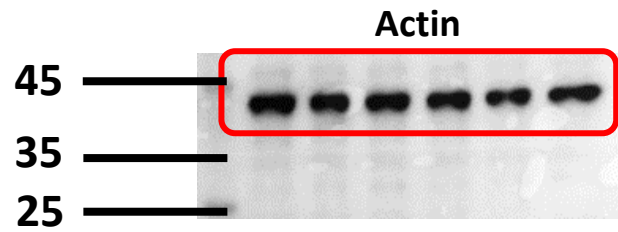

# Figure 5D

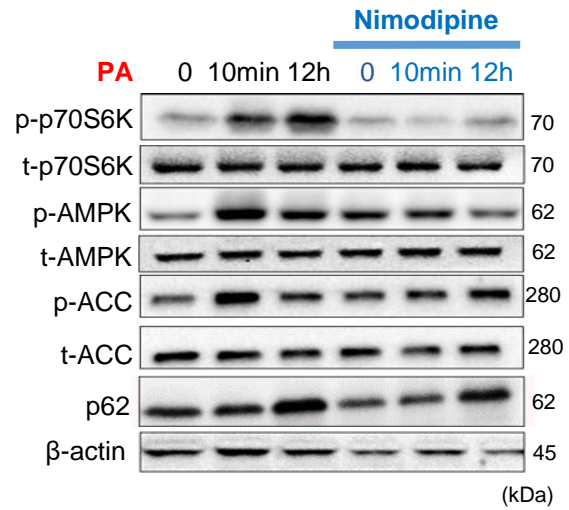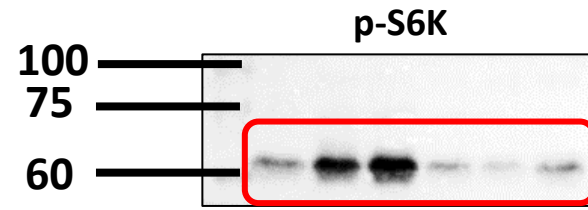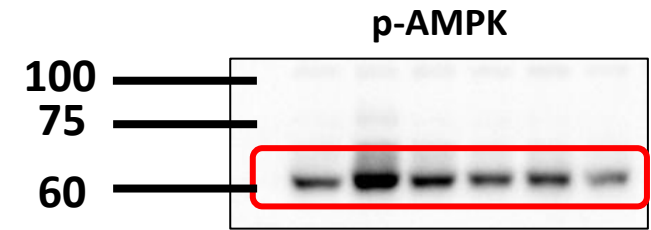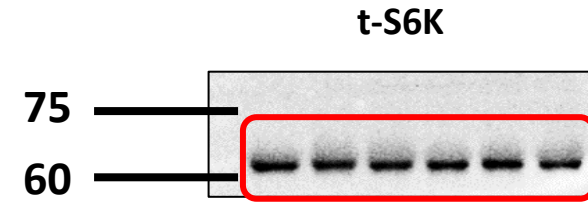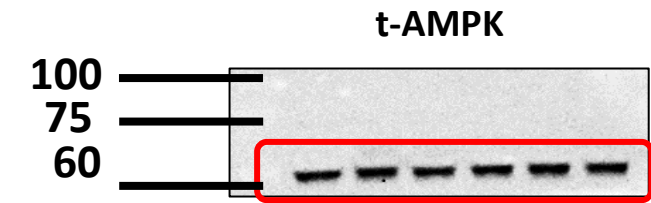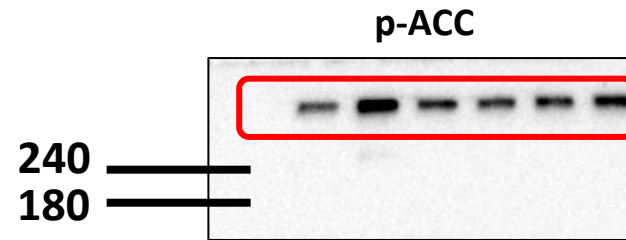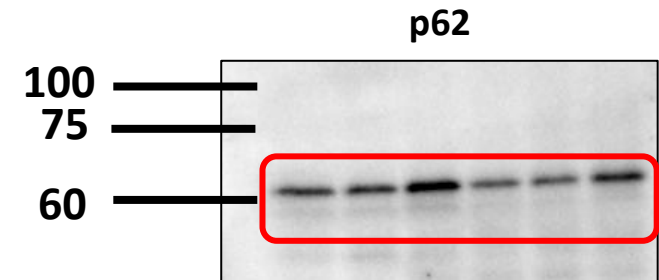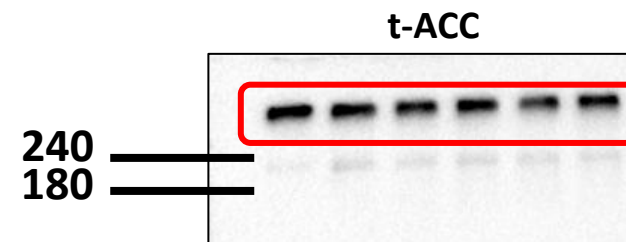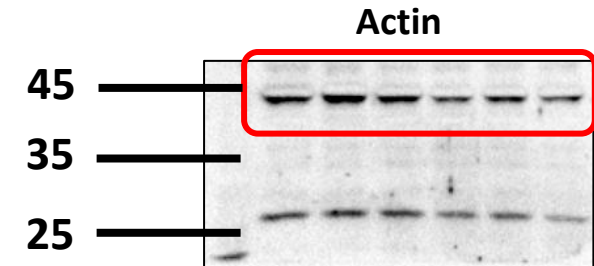

# Figure 5E

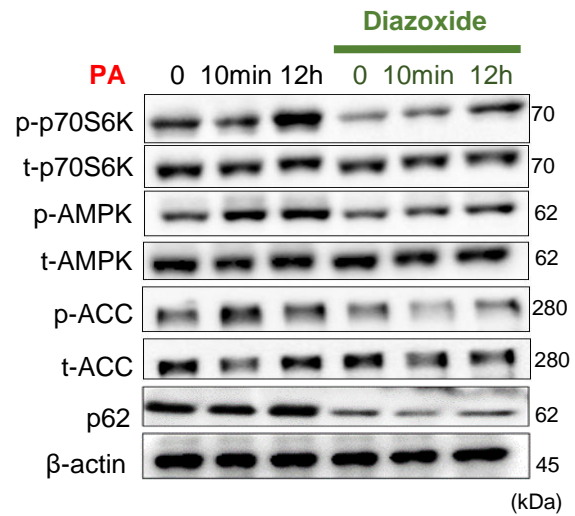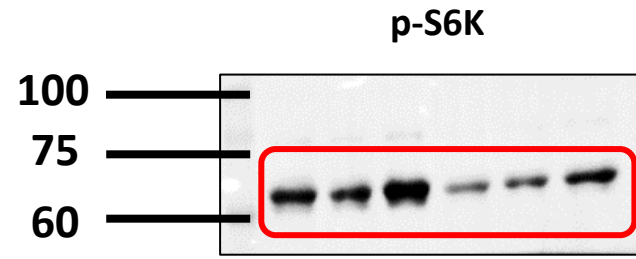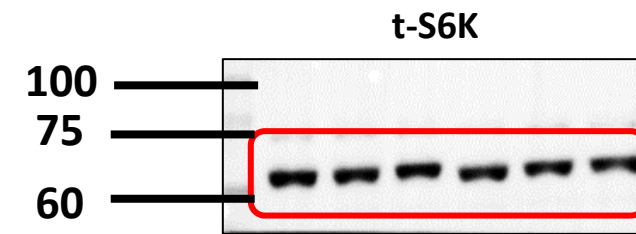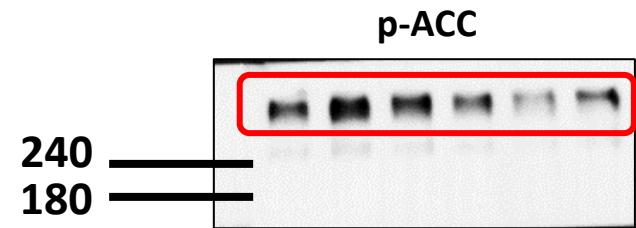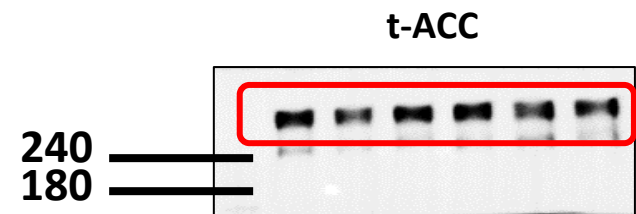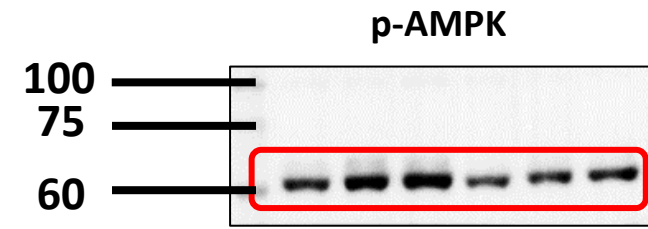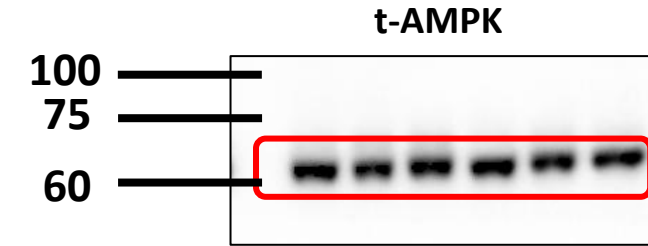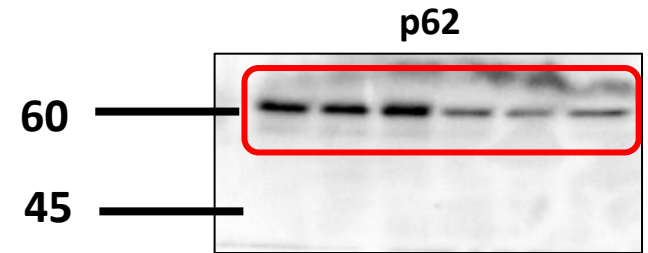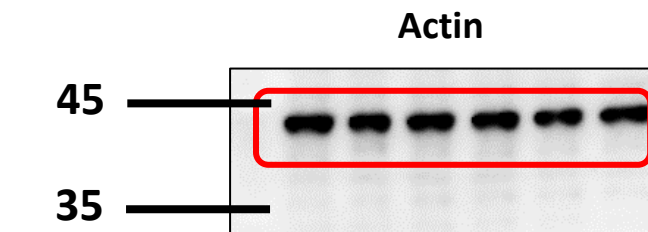

Figure 6E

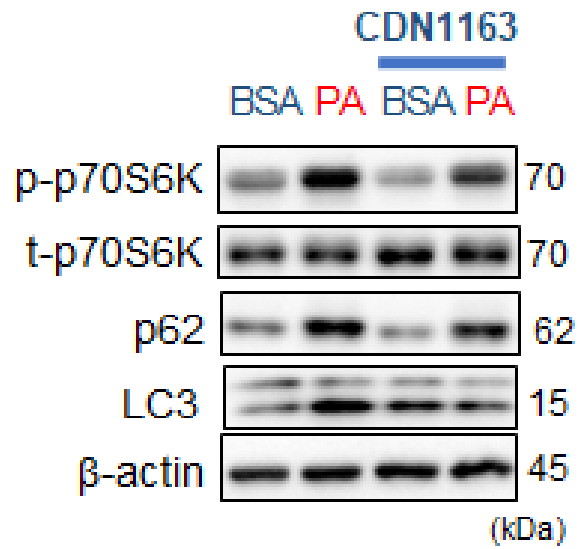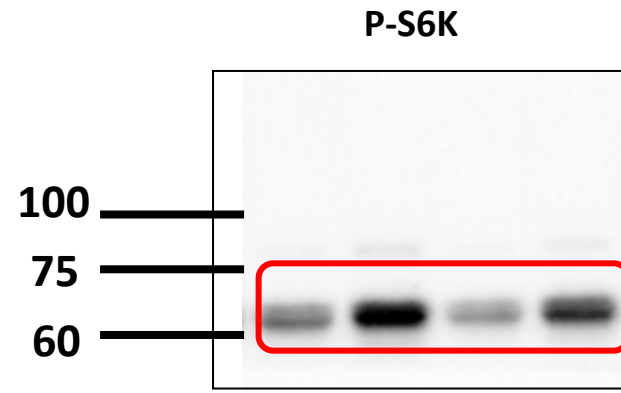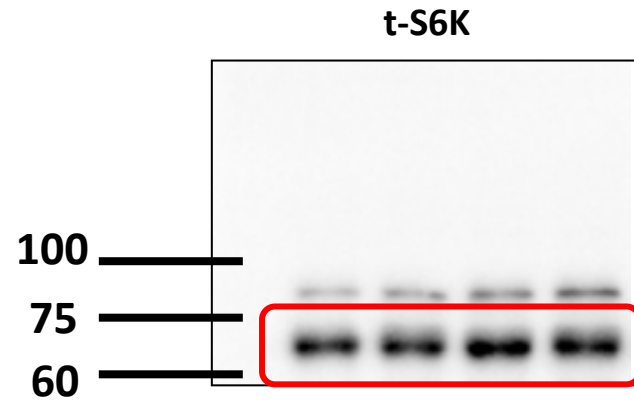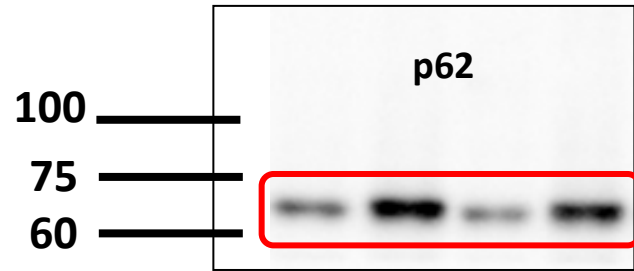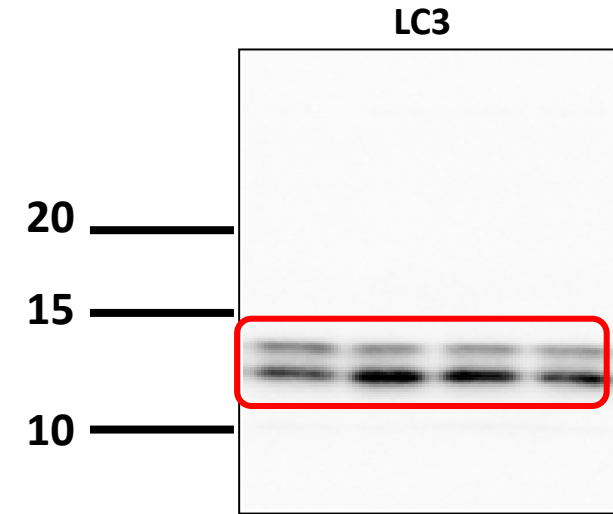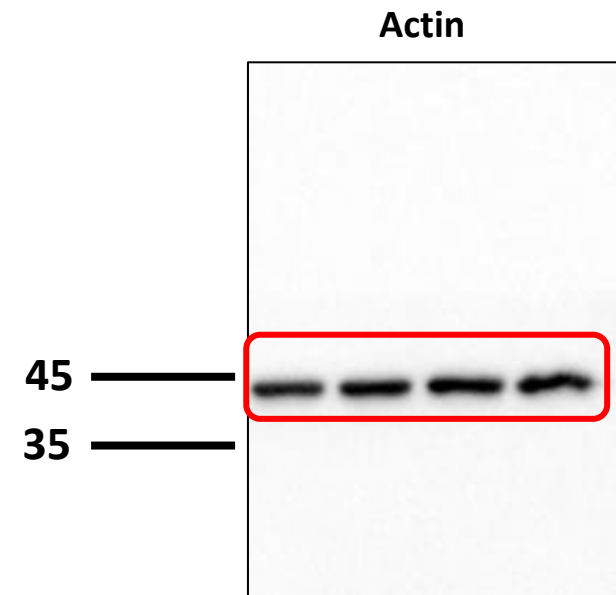

Supplement: sd2 [file 2]
