# Supplementary material for: Palmitate impairs autophagic degradation via oxidative stress/perilysosomal Ca2+ overload/mTORC1 activation pathway in pancreatic β cells
Source: JCI journal article supplement (doi:10.1172/jci.insight.192827), 2025-11-11
Supplement: sd1 [file 1]

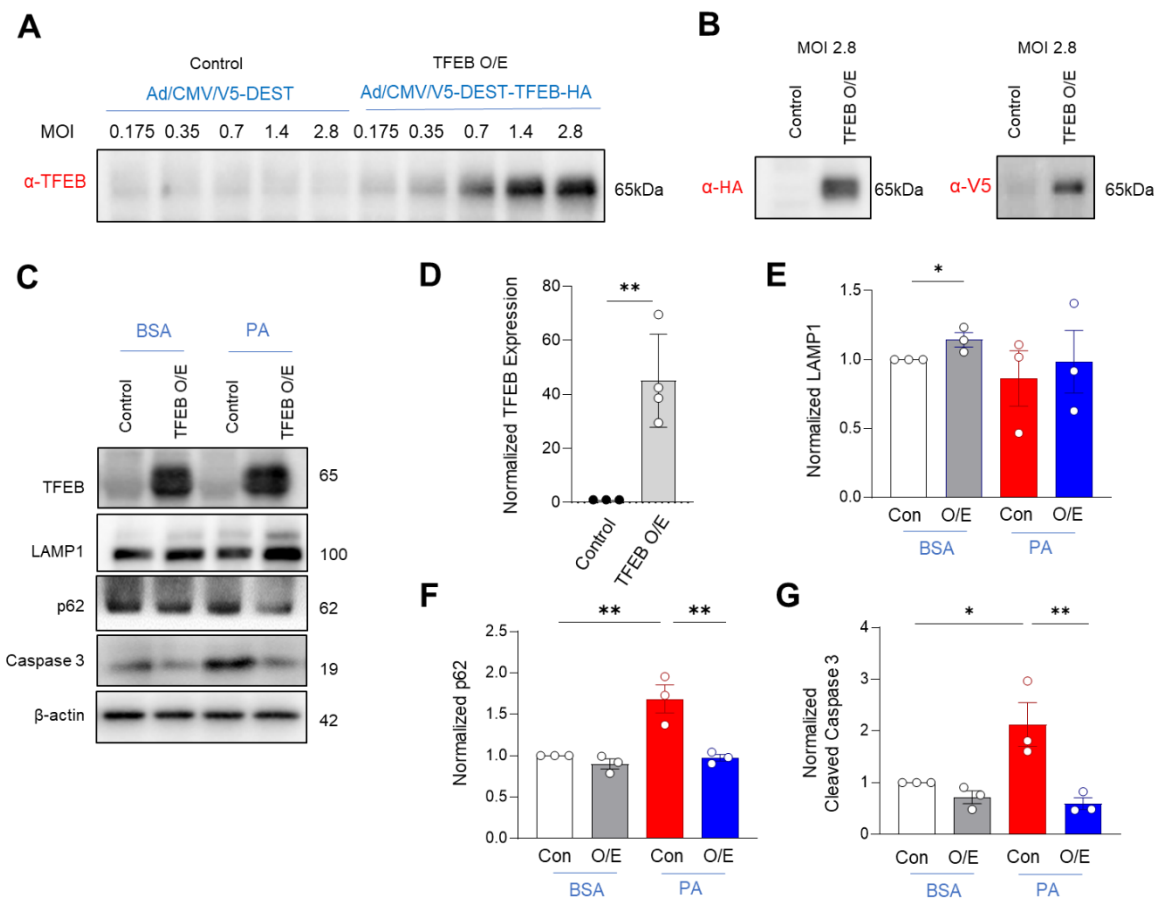

**Supplementary Figure S1. Overexpression of TFEB alleviated palmitate-induced autophagy impairment and cytotoxicity.** (A & B) MIN6 cells were infected with adenoviruses encoding either wild type TFEB (Ad/CMV/V5-DEST-TFEB-HA) or an empty vector control (Ad/CMV/V5-DEST). Expression of TFEB was confirmed by Western blot using anti-TFEB (A), anti-HA (B), and anti-V5 (B). (C-G) Overexpression of TFEB upregulated lysosomal protein LAMP1 (E), restored p62 clearance (F), and prevented Caspase-3 activation (G) in palmitate-treated MIN6 cells. Data are presented as means  $\pm$  standard errors from three independent experiments. Statistical significance was determined using unpaired two-tailed Student's t-test (D) or one-way ANOVA with post-hoc Tukey multiple comparison test (E-G). \* $p < 0.05$ ; \*\* $p < 0.01$ .

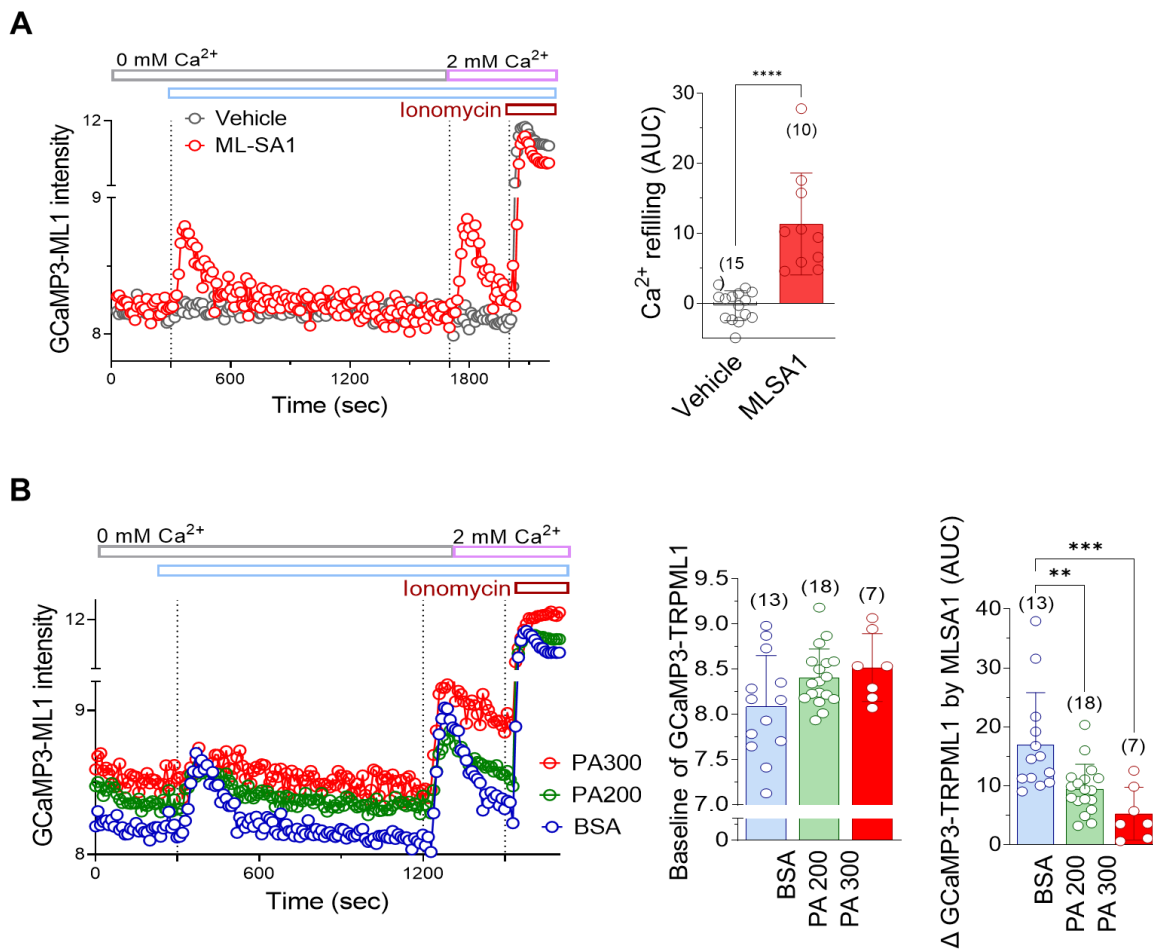

**Supplementary Figure S2. Perilyosomal  $\text{Ca}^{2+}$  measurement using high-throughput fluorescence reader with GCaMP3-TRPML1-expressing cells. (A)** Perilyosomal  $\text{Ca}^{2+}$  rise upon extracellular  $\text{Ca}^{2+}$  addition, mediated by ML-SA1-triggered SOCE. **(B)** Elevated the baseline level of perilyosomal  $\text{Ca}^{2+}$ , but abolished ML-SA1 response by palmitate (PA) in multi-well plates seeded with GCaMP3-TRPML1-expressing HEK cells. Fluorescence intensity from each well were measured by using FlexStation. (n) is the number of analyzed wells from at least 3 independent experiments. Statistical significance was determined using unpaired two-tailed Student's t-test (A) or one-way ANOVA with post-hoc Tukey multiple comparison test (B). \*\* $p < 0.01$ ; \*\*\* $p < 0.001$ ; \*\*\*\* $p < 0.0001$ .

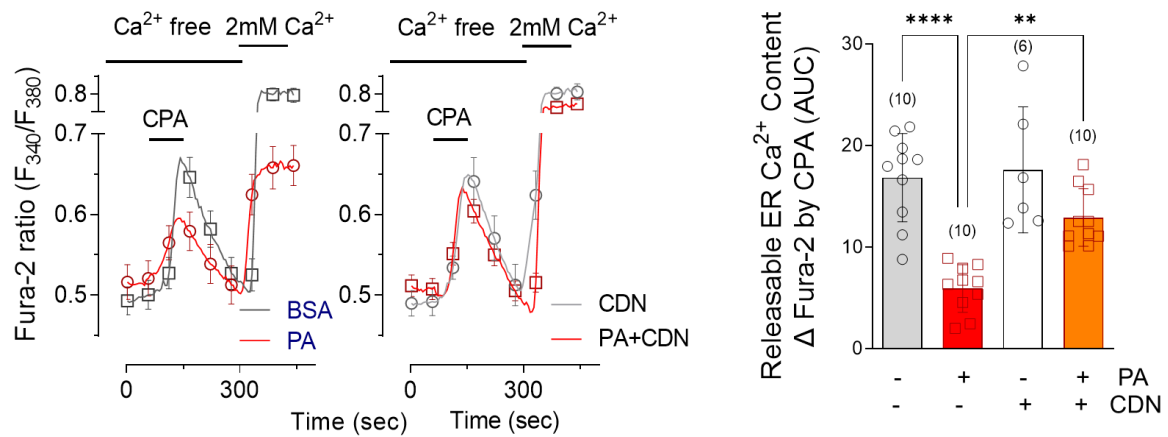

**Supplementary Figure S3. SERCA activator recovers ER Ca<sup>2+</sup> depletion by palmitate.** ER Ca<sup>2+</sup> release due to cyclopiazonic acid (CPA) was reduced in palmitate-treated MIN6 cells, which was normalized by pretreatment with CDN1163, a SERCA activator. Data are presented as means  $\pm$  standard deviations and (n) is the number of analyzed cells from more than 3 independent experiments. Statistical significance was determined using one-way ANOVA with post-hoc Tukey multiple comparison test. \*\* $p < 0.01$ ; \*\*\*\* $p < 0.0001$ .

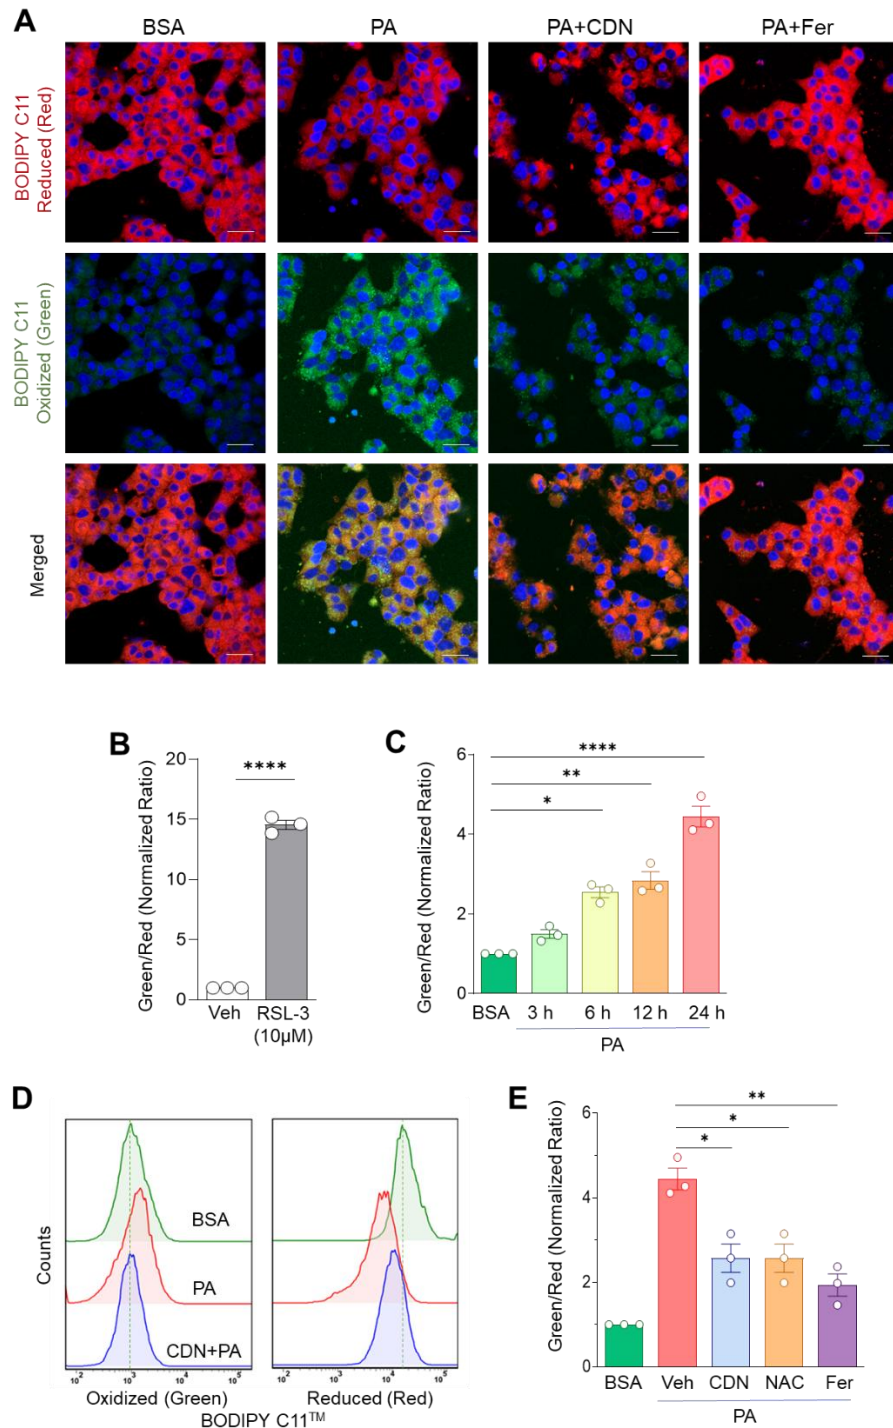

**Supplementary Figure S4. SERCA activator and antioxidant mitigate palmitate-induced ferroptotic lipid peroxidation. (A)** Lipid peroxidation associated with ferroptosis in MIN6 cells was estimated by confocal imaging using BODIPY C11; increased green and decreased red fluorescence indicating ferroptosis. **(B-E)** BODIPY

C11 fluorescence shifts were analyzed by flow cytometry. RSL-3, a ferroptosis inducer through glutathione peroxidase inhibition, increased the green-to-red fluorescence ratio (B). Palmitate also elevated this ratio in a time-dependent manner, suggesting ferroptotic lipid peroxidation. CDN1163, a small-molecule SERCA activator (D & E), and the antioxidant N-acetyl cysteine (NAC; E) reduced palmitate-induced ferroptosis. Additionally, ferrostatin (Fer), a ferroptosis inhibitor, abolished palmitate-induced peroxidation, confirming that the lipid peroxidation was ferroptotic. Data are expressed as means  $\pm$  standard errors from three independent experiments. Statistical significance was determined using unpaired two-tailed Student's t-test (B) or one-way ANOVA with post-hoc Tukey multiple comparison test (C, E). \* $p < 0.05$ ; \*\* $p < 0.01$ ; \*\*\*\* $p < 0.0001$ .

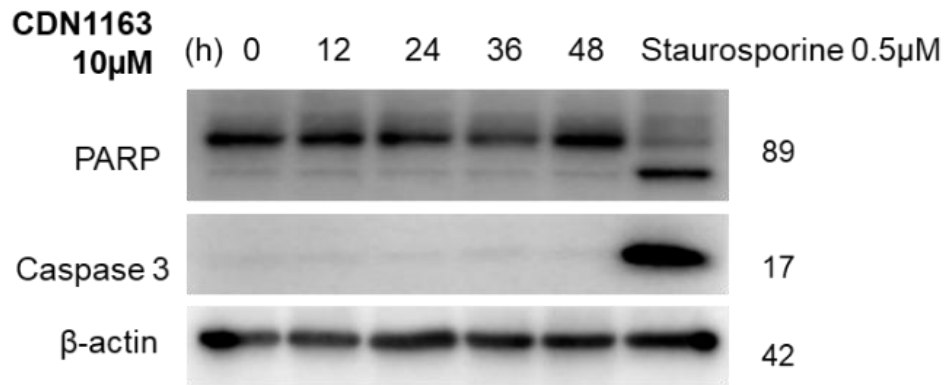

**Supplementary Figure S5. CDN1163, a SERCA activator, does not induce cytotoxicity.** Cytotoxicity was assessed by detecting PARP cleavage and activated Caspase-3 via Western blot analysis. Incubating MIN6 cells with CDN1163 (10  $\mu$ M) for 48 h showed no signs of cytotoxicity, whereas treatment with staurosporine (0.5  $\mu$ M, 8 h) resulted in PARP cleavage and activated Caspase-3.

**Supplementary Table 1. Reagents and Tools**

| Reagents/Resources            | Reference/Source         | Identifier/Catalogue Number        |
|-------------------------------|--------------------------|------------------------------------|
| <b>Antibodies</b>             |                          |                                    |
| Rabbit anti-SERCA2            | Cell Signaling T.        | Cat. 9580, RRID:AB_10827913        |
| Rabbit anti-p62               | Cell Signaling T.        | Cat.8025, RRID: AB_10562134        |
| Rabbit anti-LC3               | Cell Signaling T.        | Cat.12741, RRID: AB_2278129        |
| Rabbit anti-p-p70S6K          | Cell Signaling T.        | Cat.9234, RRID: AB_330944          |
| Rabbit anti-t-p70S6K          | Cell Signaling T.        | Cat.9202, RRID: AB_330930          |
| Rabbit anti-p-ACC             | Cell Signaling T.        | Cat.3661, RRID: AB_330337          |
| Rabbit anti-t-ACC             | Cell Signaling T.        | Cat.3662, RRID: AB_2223182         |
| Rabbit anti-p-AMPK            | Cell Signaling T.        | Cat.2535, RRID: AB_330330          |
| Rabbit anti-t-AMPK            | Cell Signaling T.        | Cat.2532, RRID: AB_10622186        |
| Rabbit anti Cleaved Caspase 3 | Cell Signaling T.        | Cat.9661, RRID: AB_2341188         |
| Rabbit anti-TFEB              | Cell Signaling T.        | Cat.37785, RRID: AB_2799103        |
| Rabbit anti-LaminA/C          | Cell Signaling T.        | Cat.2032, RRID: AB_2136278         |
| Mouse anti- $\beta$ actin     | Proteintech              | Cat. 20536-1-AP, RRID: AB_10700003 |
| Mouse anti-alpha tubulin      | DSHB                     | Cat# 12G10, RRID: AB_1157911       |
| Rabbit anti-LAMP2             | Cell Signaling T.        | Cat. 49067, RRID: AB_2798843       |
| Mouse anti-LAMP1              | Santa Cruz Bio.          | Cat. 20011, RRID: AB_626853        |
| Rabbit anti-TFEB              | Proteintech              | Cat. 13372-1, RRID: AB_2199611     |
| Mouse anti-V5-Tag             | Invitrogen               | Cat. R960-25, RRID: AB_2556564     |
| Rabbit anti-HA-Tag            | Cell Signaling T.        | Cat. 3724, RRID:AB_1549585         |
| Rabbit anti-PARP              | Cell Signaling T.        | Cat. 9542, RRID:AB_2160739         |
| <b>Chemicals, Reagents</b>    |                          |                                    |
| CDN1163                       | Sigma Aldrich            | Cat. SML1682                       |
| Torin-1                       | Sigma Aldrich            | Cat. 475991                        |
| CM-H2DCFDA                    | Invitrogen               | Cat. C6827                         |
| mitoSOX                       | Invitrogen               | Cat. M36008                        |
| GPN                           | Santa Cruz Biotechnology | Cat. G6149                         |
| MLSA1                         | Sigma Aldrich            | Cat. SML0627                       |
| Ionomycin                     | Alomone labs             | Cat. I-700                         |
| Menadione                     | Sigma Aldrich            | Cat. M5625                         |

|                                            |                             |                   |
|--------------------------------------------|-----------------------------|-------------------|
| H <sub>2</sub> O <sub>2</sub>              | Sigma Aldrich               | Cat. H1009        |
| MitoTEMPO                                  | Sigma Aldrich               | Cat. SML0737      |
| BAPTA-AM                                   | Sigma Aldrich               | Cat. A1076        |
| W7                                         | Sigma Aldrich               | Cat. A4844        |
| KN62                                       | Sigma Aldrich               | Cat. K1125        |
| Verapamil                                  | Sigma Aldrich               | Cat. V4629        |
| Nimodipine                                 | Sigma Aldrich               | Cat. N149         |
| Diazoxide                                  | Sigma Aldrich               | Cat. D9035        |
| Fura-2 AM                                  | Invitrogen                  | Cat. IN-F1201     |
| JC-1                                       | Invitrogen                  | Cat. T3168        |
| Cyclopiazonic acid (CPA)                   | Sigma Aldrich               | Cat. C1530        |
| Oligomycin                                 | Sigma Aldrich               | Cat. 75351        |
| FCCP                                       | Sigma Aldrich               | Cat. C2920        |
| Rotenone                                   | Sigma Aldrich               | Cat. R8875        |
| Anitmycin A                                | Sigma Aldrich               | Cat. A8674        |
| Paraformaldehyde                           | Sigma Aldrich               | Cat. P6148        |
| Sodium Palmitate                           | Sigma Aldrich               | Cat. P9767        |
| Bovine serum albumin                       | Sigma Aldrich               | Cat. A6003        |
| DAPI Fluoromount-G                         | Roche                       | Cat. 10236276001  |
| Ribo EX                                    | GeneAll                     | Cat. 301-001      |
| Beta-mercaptoethanol                       | Sigma Aldrich               | Cat. M6250        |
| RIPA buffer                                | SupremeTech                 | Cat. ST1090-RI    |
| Phosphatase inhibitor<br>(PhosSTOP)        | Roche                       | Cat. 4906845001   |
| Protease inhibitor                         | Roche                       | Cat. 5892791001   |
| X-tremeGENE HP DNA<br>Transfection Reagent | Roche                       | Cat. 6366236001   |
| OptiMEM I                                  | Thermo Fisher<br>Scientific | Cat. 31985-062    |
| BODIPY <sup>TM</sup> 581/591 C11           | Thermo Fisher<br>Scientific | Cat.D3861         |
| <b>Critical commercial assays</b>          |                             |                   |
| MTT                                        | Sigma Aldrich               | Cat. M2128        |
| Cell Death Detection<br>ELISA kit          | Roche                       | Cat. 11774425001  |
| Adeno-X <sup>TM</sup> Rapid Titer kit      | Takara                      | Cat. 632250       |
| <b>Experimental models</b>                 |                             |                   |
| MIN6                                       | AddexBio                    | RRID:CVCL_0431    |
| C57BL/6N                                   | DBL                         |                   |
| <b>Software and algorithms</b>             |                             |                   |
| Prism 9.1                                  | GraphPad                    | GP9-1988787-RLRM- |

---

FA1F1

---

Image J

---

**Others**

---

|                              |               |                      |
|------------------------------|---------------|----------------------|
| siATP2a2                     | Dharmacon     | Cat. M040968-02-0050 |
| Human SERCA2a<br>(pcDNA3.1+) | Addgene       | Cat. 75187           |
| Human SERCA2b<br>(pcDNA3.1+) | Addgene       | Cat. 75188           |
| pCAG G-CEPIA1er              | Addgene       | Cat. 105012          |
| 2mt-CEPIA plasmid            | Addgene       | Cat. 58218           |
| GCaMP3-TRPML1                | from Prof. Xu |                      |
| LC3-GFP-RFP                  | Addgene       | Cat. 21074           |
| TFEB-pEGFP                   | Addgene       | Cat. 38119           |
| pcDNA3-Lyso-TORCAR           | Addgene       | Cat. 64929           |

---
